# Supplementary material
Source: Copernicus journal article supplement (doi:10.5194/egusphere-2026-2074)
Supplement: Supplementary file 1 [file egusphere-2026-2074-supplement.pdf]

## Quantifying Patterns and Drivers of Larval Dispersal in Japanese Anchovy (*Engraulis japonicus*) in the China Seas

Wei Shi<sup>1,2</sup>, Leon Boegman<sup>2</sup>, Shiliang Shan<sup>2,3</sup>, Yongjun Tian<sup>1</sup>, Yang Liu<sup>1</sup>, Peng Sun<sup>1</sup>, Zhenjiang Ye<sup>1</sup>, Qinwang Xing<sup>4</sup>, Jianchao Li<sup>1</sup>

<sup>1</sup>Deep Sea and Polar Fisheries Research Center, and Key Laboratory of Mariculture, Ministry of Education, Ocean University of China, Qingdao, 266100, China

<sup>2</sup>Environmental Fluid Dynamics Laboratory, Department of Civil Engineering, Queen's University, Kingston, ON K7L 3N6, Canada

<sup>3</sup>Department of Physics and Space Science, Royal Military College of Canada, Kingston, ON K7K 7B4, Canada

<sup>4</sup>College of Marine Living Resource Sciences and Management, Shanghai Ocean University, Shanghai, 201306, China

Correspondence to: Jianchao Li (lijianchao@ouc.edu.cn) and Qinwang Xing (qwxing@shou.edu.cn)

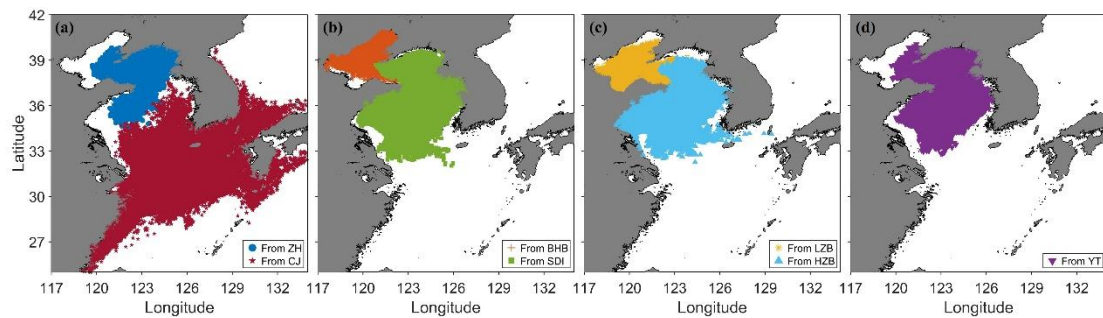

**Figure S1.** Larval settlement patterns of Japanese anchovy (*Engraulis japonicus*) by spawning ground. Larvae were released from (a) ZH and CJ, (b) BHB and SDI, (c) LZB and HZB, (d) from YT.

**Table S1.** Goodness of fit criteria for Japanese anchovy dispersal kernel by different spawning ground. Alternative probability density functions are considered, with AIC, and BIC criteria used. The smallest values are marked in red color.

| p.d.f.      | AIC             |        |        |       |       |        |        |        |         |
|-------------|-----------------|--------|--------|-------|-------|--------|--------|--------|---------|
|             | Spawning ground | ZH     | BHB    | LZB   | YT    | SDI    | HZB    | CJ     | All     |
| Weibull     |                 | 215952 | 224930 | 69266 | 38741 | 394410 | 877654 | 576120 | 2441064 |
| Gamma       |                 | 216650 | 226990 | 69154 | 38988 | 397130 | 878358 | 574756 | 2438144 |
| Exponential |                 | 225218 | 236426 | 71668 | 41209 | 418842 | 895746 | 591348 | 2493822 |
| Lognormal   |                 | 219550 | 231626 | 69654 | 39564 | 403020 | 888180 | 577192 | 2458904 |
| Normal      |                 | 218290 | 225370 | 70788 | 38879 | 395622 | 896696 | 588986 | 2506004 |

|                 |        |        |       |       |        |        |        |         |
|-----------------|--------|--------|-------|-------|--------|--------|--------|---------|
| Log-logistic    | 218906 | 229774 | 69504 | 39327 | 400702 | 885914 | 576562 | 2450784 |
| Logistic        | 218614 | 226480 | 70559 | 38985 | 397564 | 896492 | 586624 | 2486584 |
|                 |        |        |       |       |        |        |        |         |
| p.d.f.          | BIC    |        |       |       |        |        |        |         |
| Spawning ground | ZH     | BHB    | LZB   | YT    | SDI    | HZB    | CJ     | All     |
| Weibull         | 215988 | 224966 | 69297 | 38770 | 394448 | 877695 | 576159 | 2441109 |
| Gamma           | 216686 | 227026 | 69185 | 39017 | 397168 | 878399 | 574795 | 2438189 |
| Exponential     | 225236 | 236444 | 71683 | 41224 | 418861 | 895766 | 591367 | 2493844 |
| Lognormal       | 219586 | 231662 | 69685 | 39593 | 403058 | 888221 | 577231 | 2458949 |
| Normal          | 218326 | 225406 | 70819 | 38907 | 395660 | 896737 | 589025 | 2506049 |
| Log-logistic    | 218942 | 229810 | 69535 | 39356 | 400740 | 885955 | 576601 | 2450829 |
| Logistic        | 218650 | 226516 | 70590 | 39014 | 397602 | 896533 | 586663 | 2486629 |
